# Supplementary material for: Self-assembly of heterometallic LnIII–CoIIcoordination polymers: syntheses, structures, and magnetic studies
Source: Royal Society of Chemistry journal article supplement (doi:10.1039/c5dt02280k), 2015-01-01
Supplement: c5dt02280k1.pdf [file c5dt02280k1.pdf]

## Electronic Supporting Information

### Self-Assembly of Heterometallic Ln<sup>III</sup>-Co<sup>II</sup> Coordination Polymers:

#### Syntheses, Structures, and Magnetic studies

Xiao-Qing Zhao, Xu-Hui Liu<sup>a</sup>, Xiao-Min Kang<sup>a</sup> Bin Zhao<sup>\*</sup>

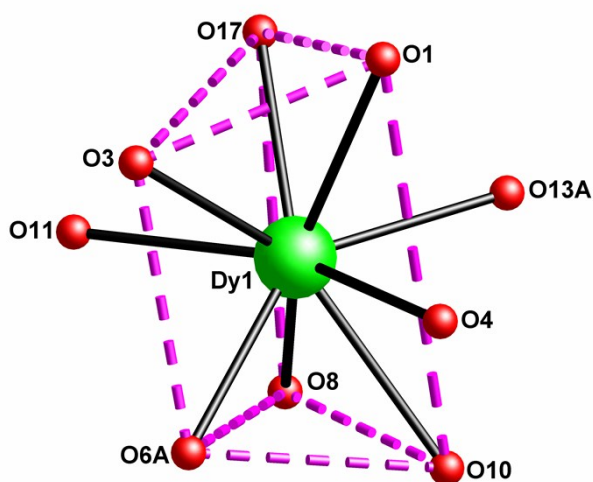

Fig. S1 The coordination geometry of Dy1 center.

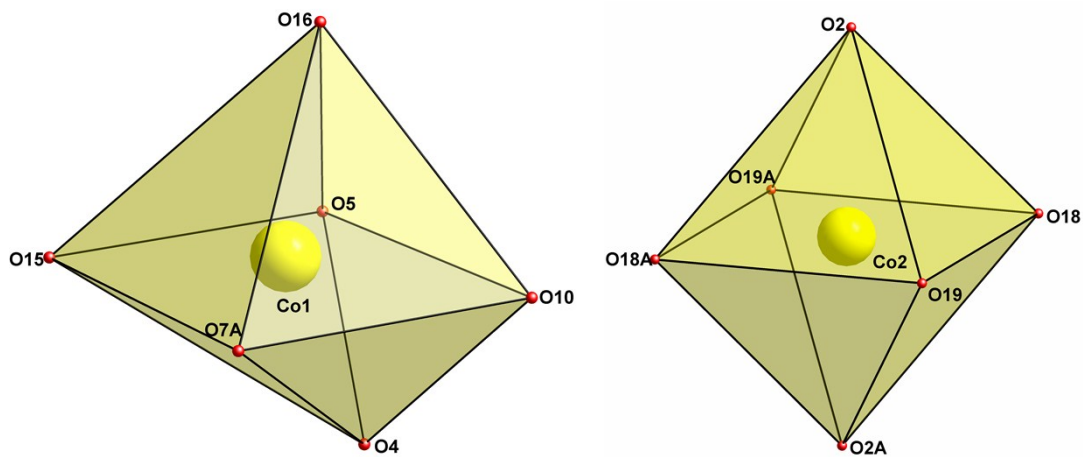

Fig. S2 The coordination geometry of Co1 and Co2 centers.

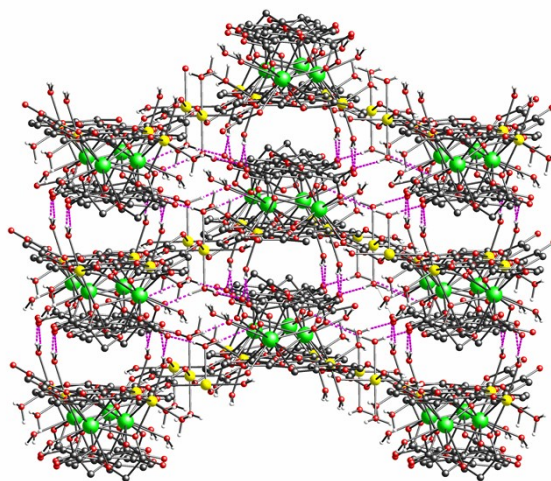

**Fig. S3** The 3D supermolecular structure by hydrogen bonds of compound 5.

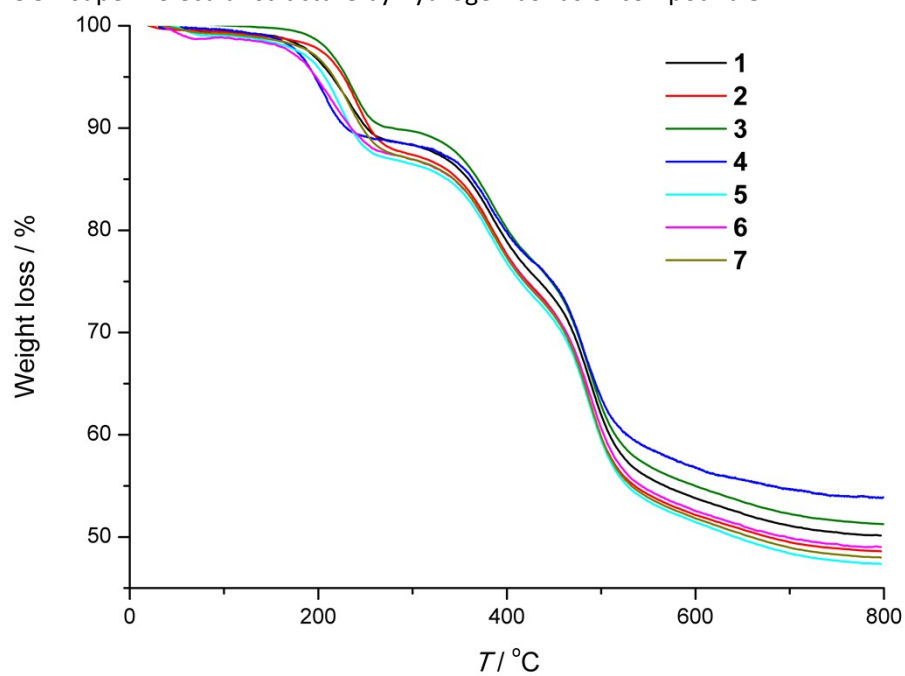

**Figure S4.** The TGA curves of compounds 1-7 measured under N<sub>2</sub> atmosphere.

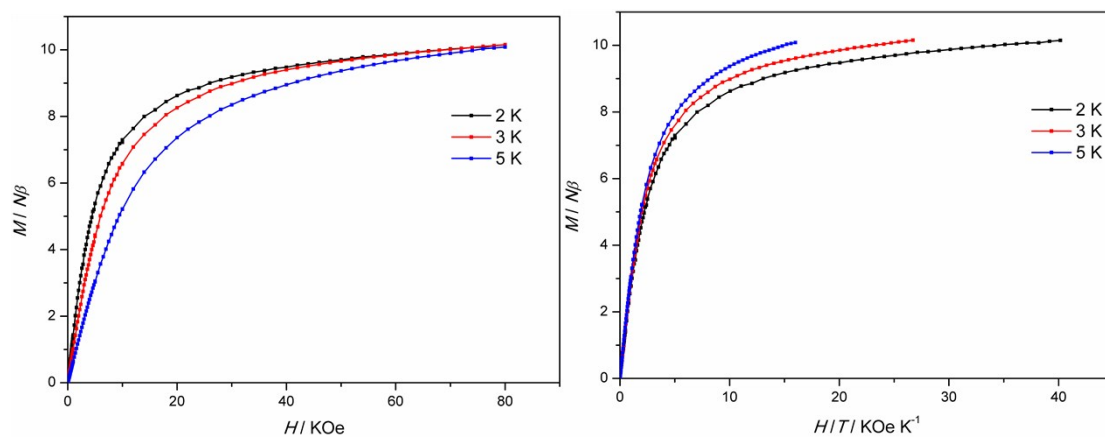

**Fig. S5** Field dependence of the magnetization for compound 5.

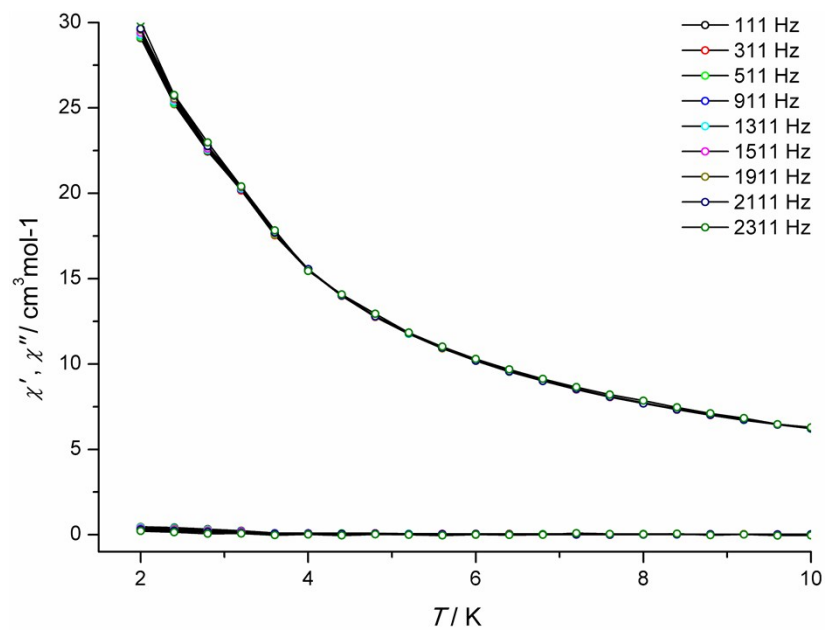

**Fig. S6** Temperature dependence of ac susceptibilities for compound **5** in zero dc field.

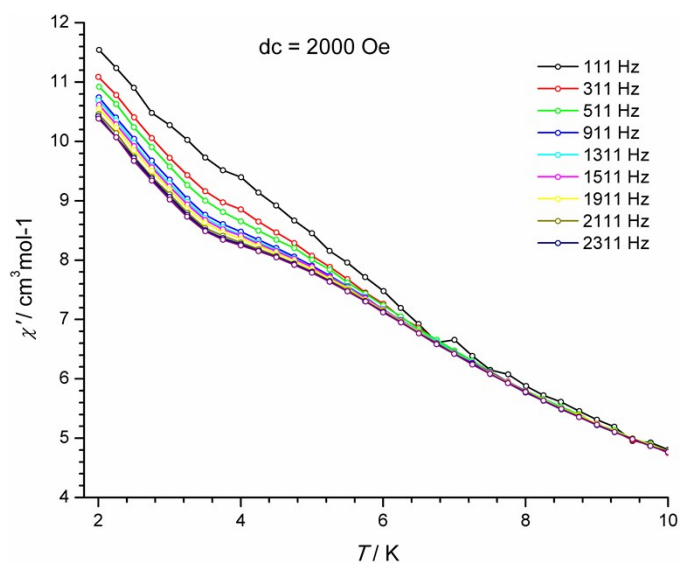

**Fig. S7** Temperature dependence of the out-of-phase ( $\chi'$ ) ac susceptibilities for compound **5** in 2000 Oe dc field.
